# Supplementary material for: Inhibition of Herpes Simplex Viruses, Types 1 and 2, by Ginsenoside 20(S)-Rg3
Source: PubMed Central journal article supplement (PMC9728284; doi:10.4014/jmb.1908.08047), 2019-11-06
Supplement: JMB-30-1-101-supple.pdf [file JMB-30-1-101-supple.pdf]

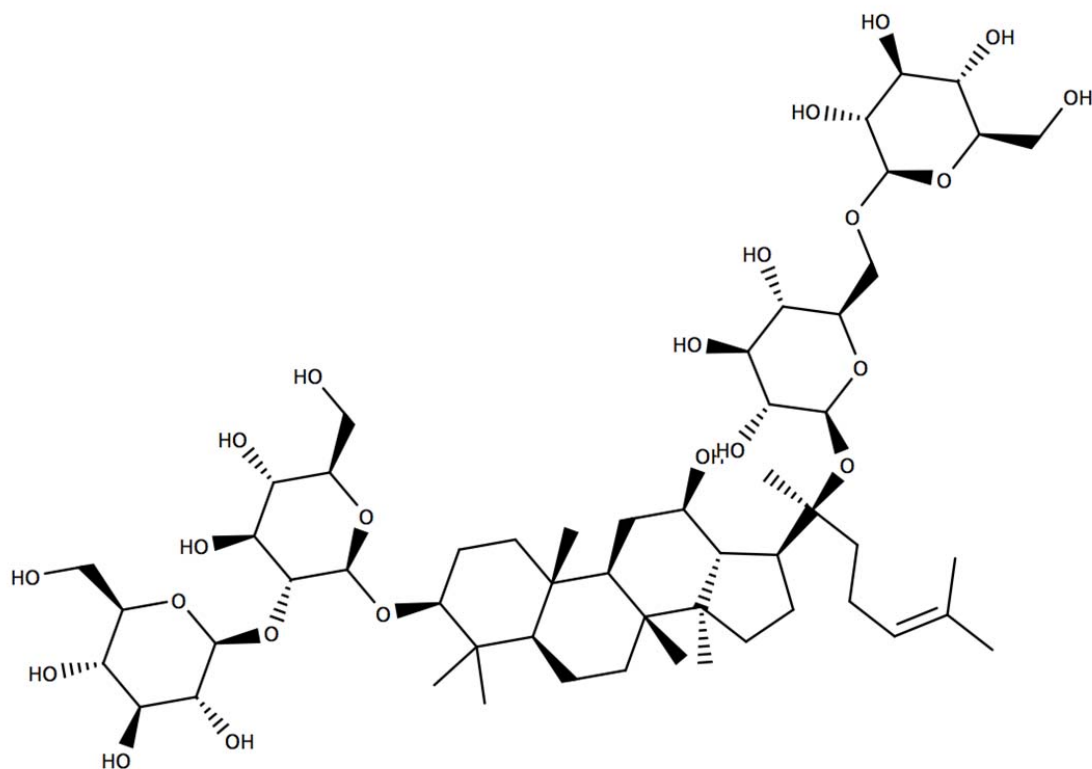

**SFigure 1a. Ginsenoside Rb1.**

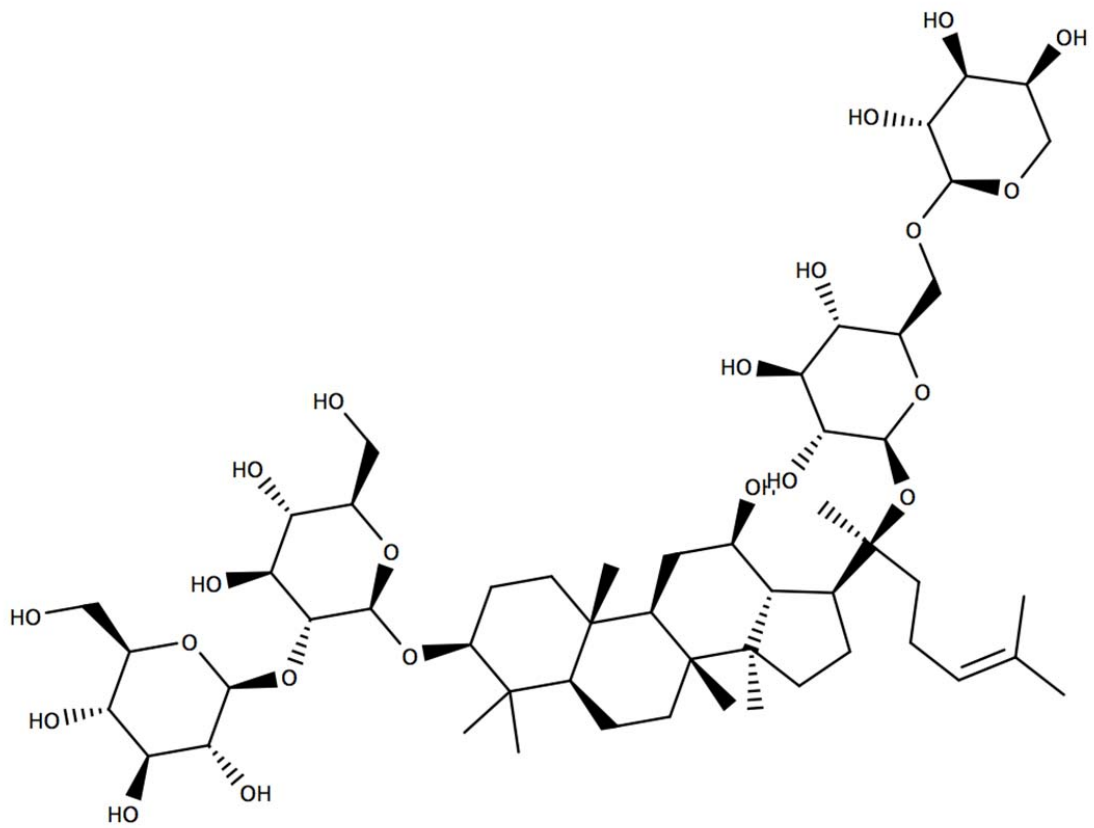

**Figure 1b. Ginsenoside Rb2.**

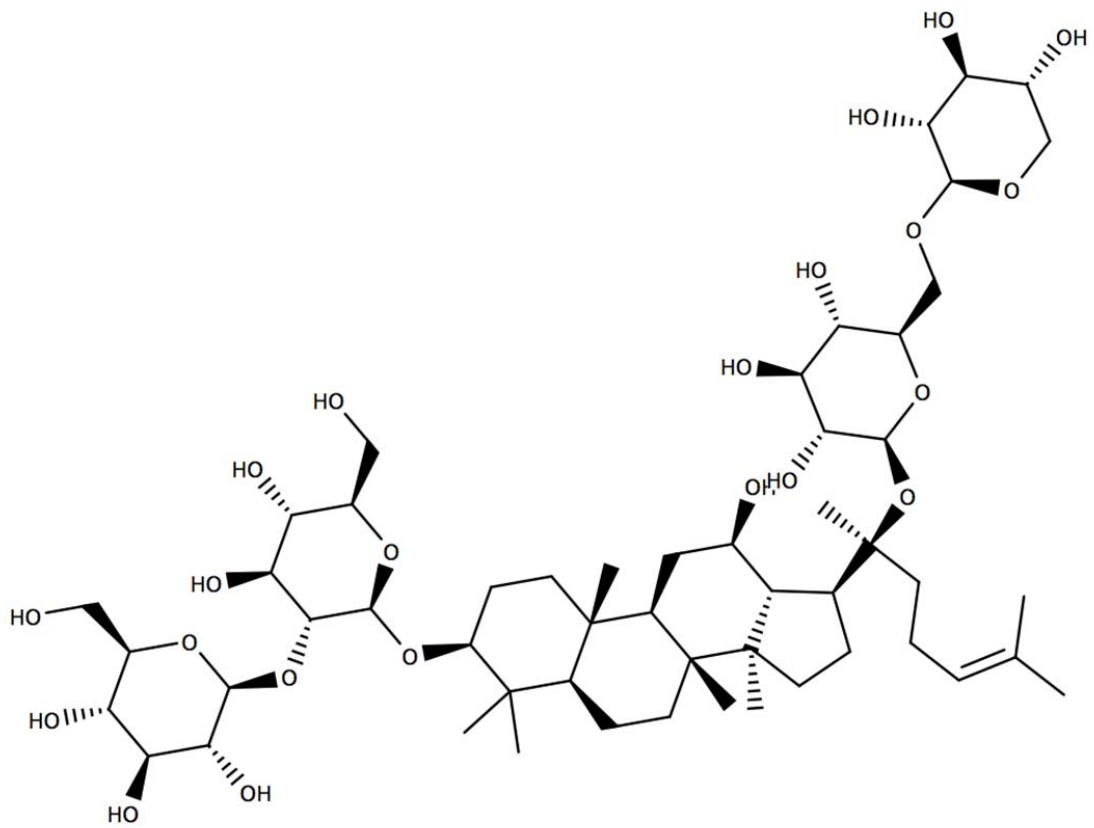

**Figure 1c. Ginsenoside Rb3.**

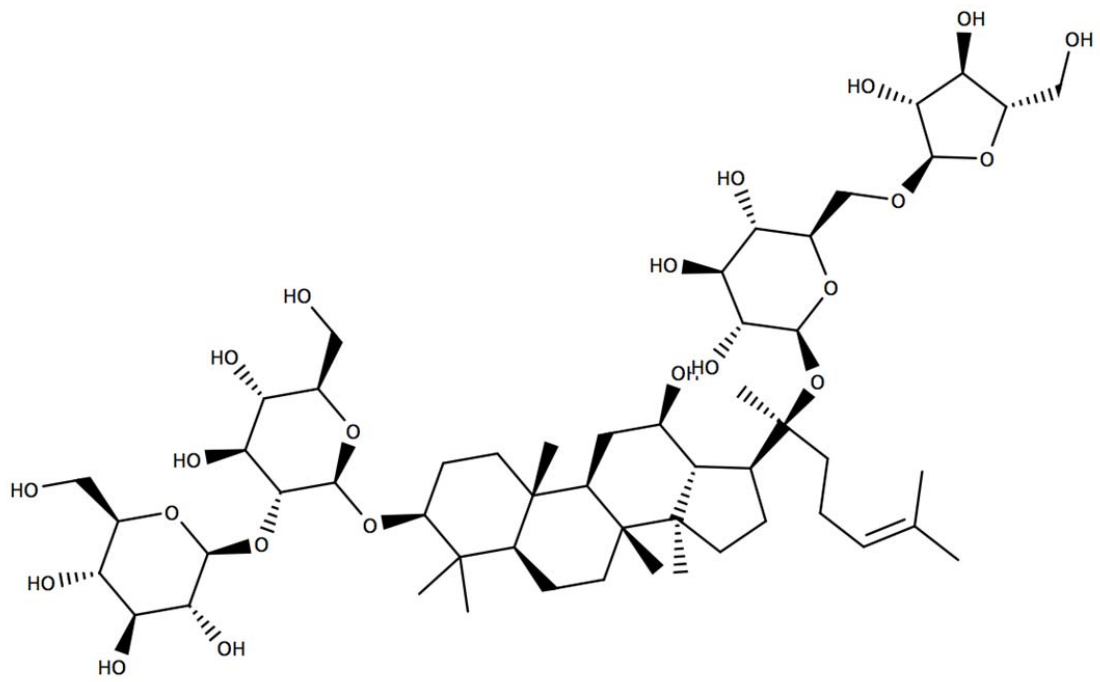

**Figure 1d. Ginsenoside Rc.**

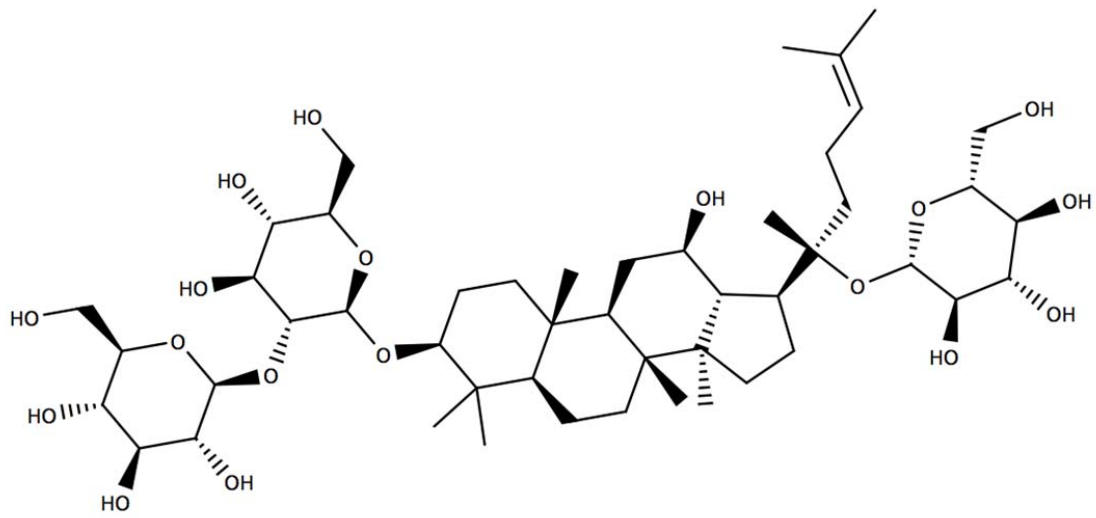

**Figure 1e. Ginsenoside Rd.**

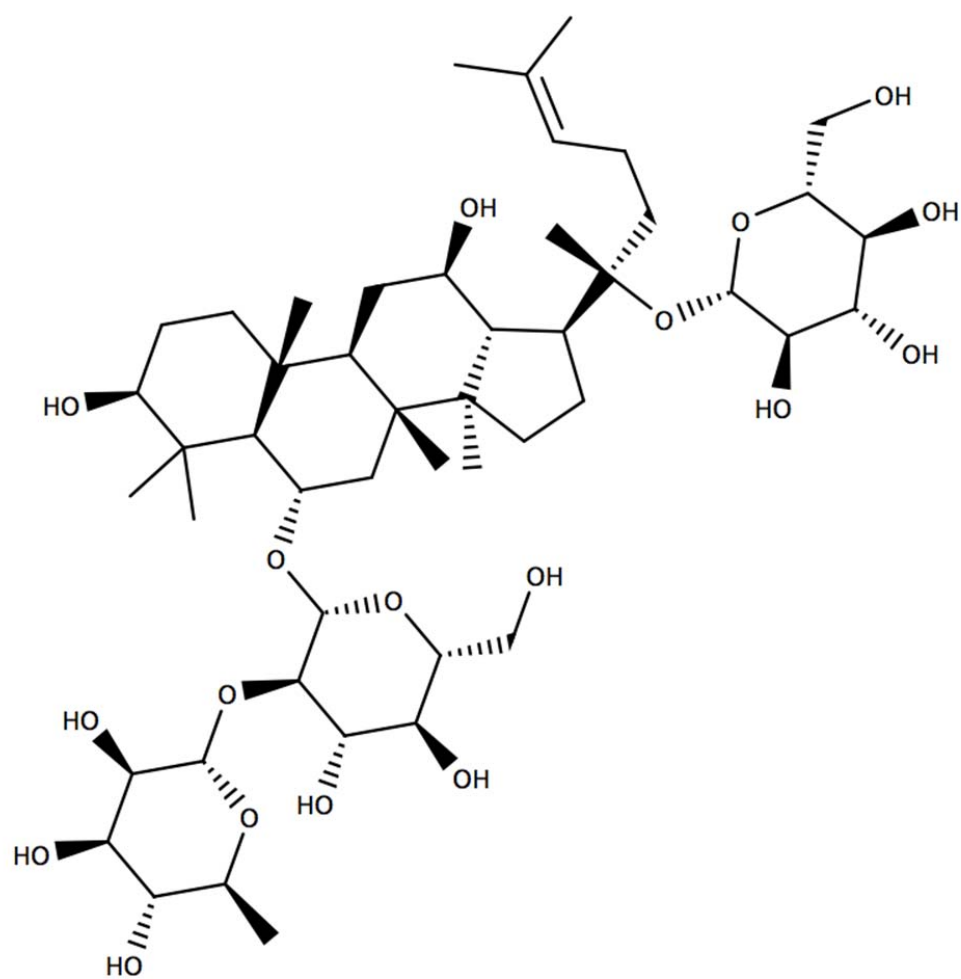

**Figure 1f. Ginsenoside Re.**

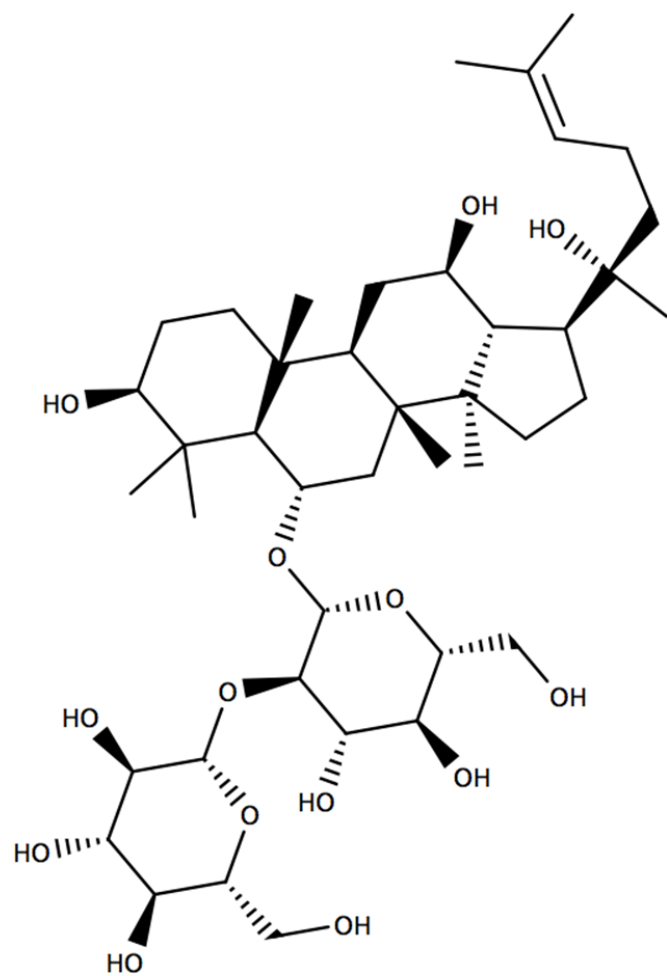

**Figure 1g. Ginsenoside Rf.**

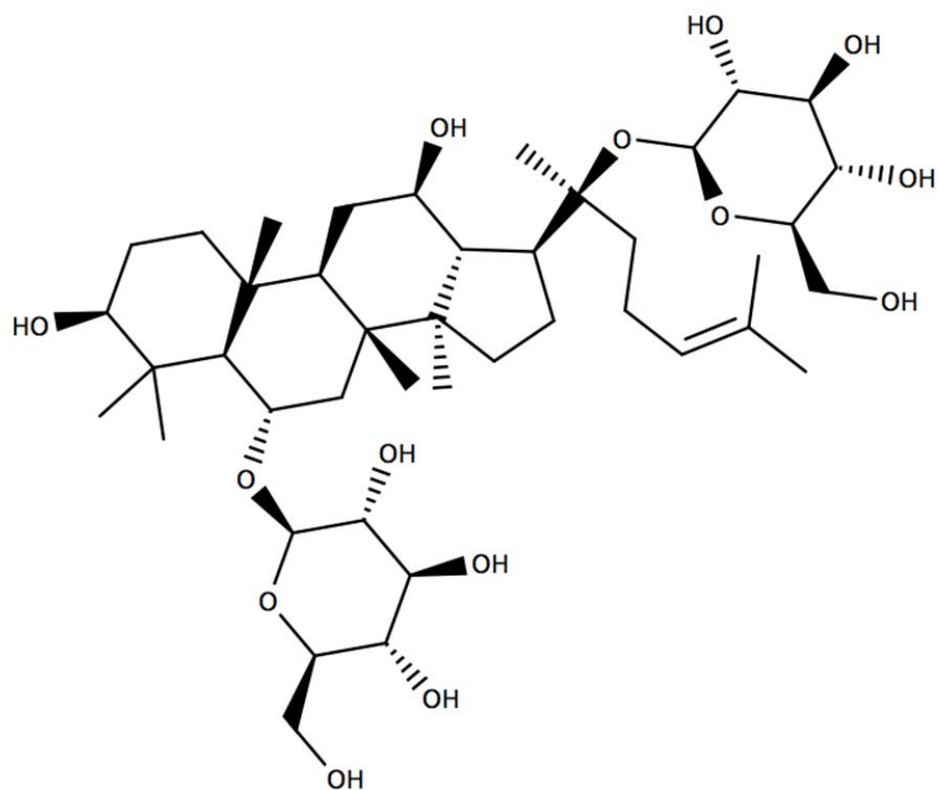

**Figure 1h. Ginsenoside Rg1.**



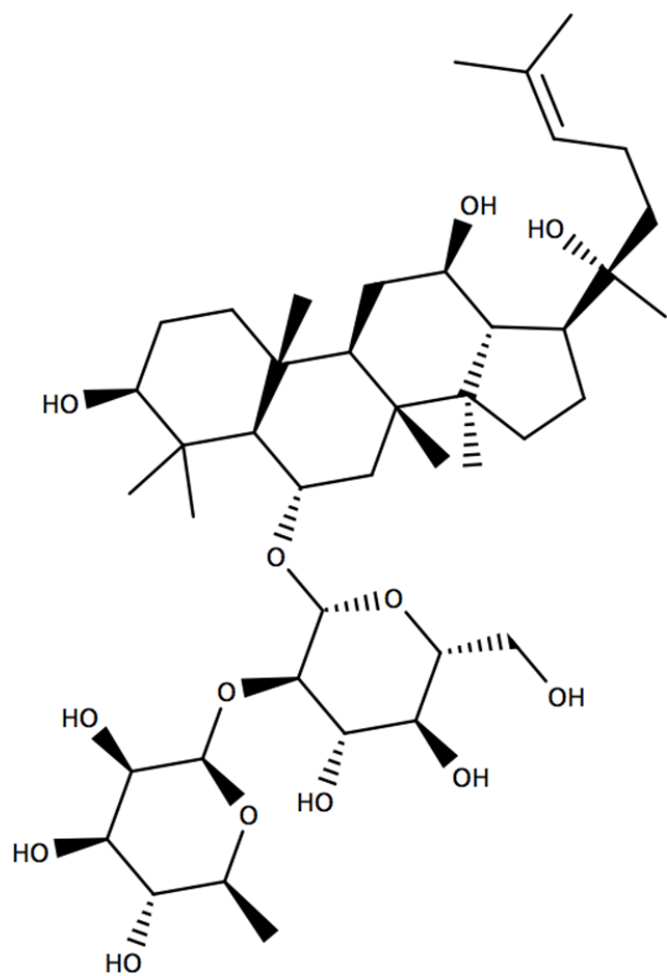

**Figure 1i. 20(S)-Ginsenoside Rg2.**

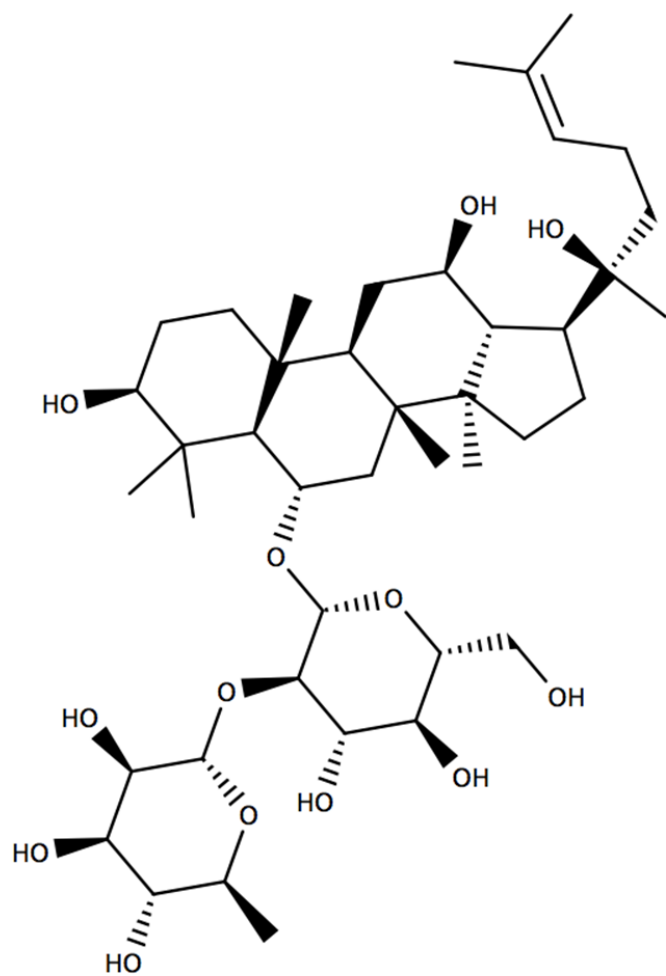

**Figure 1j. 20(R)-Ginsenoside Rg2.**

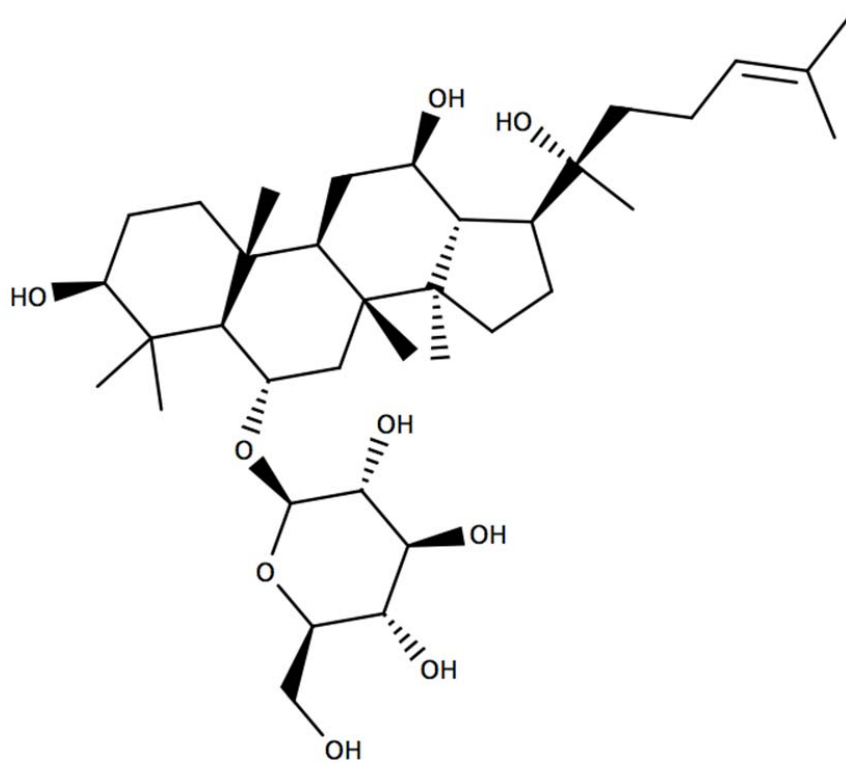

**SFigure 1k. 20(S)-Ginsenoside Rh1.**

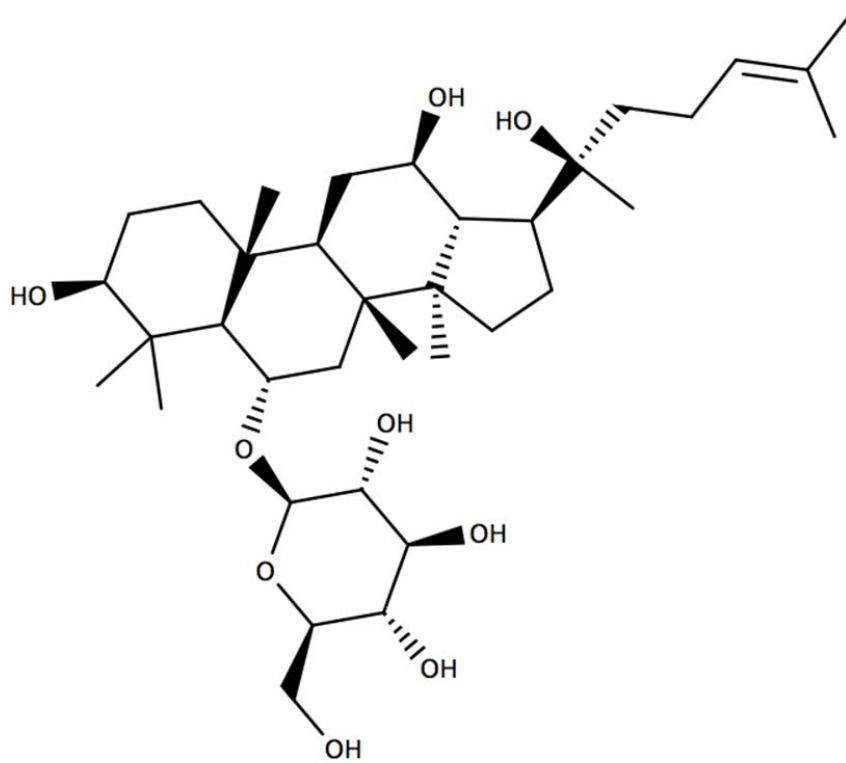

**Figure 11. 20(R)-Ginsenoside Rh1.**

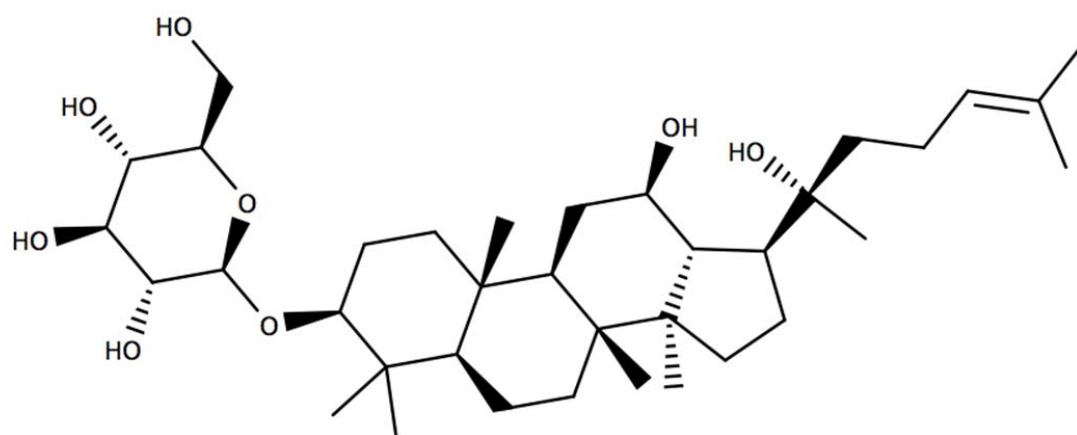

**Figure 1m. 20(S)-Ginsenoside Rh2.**

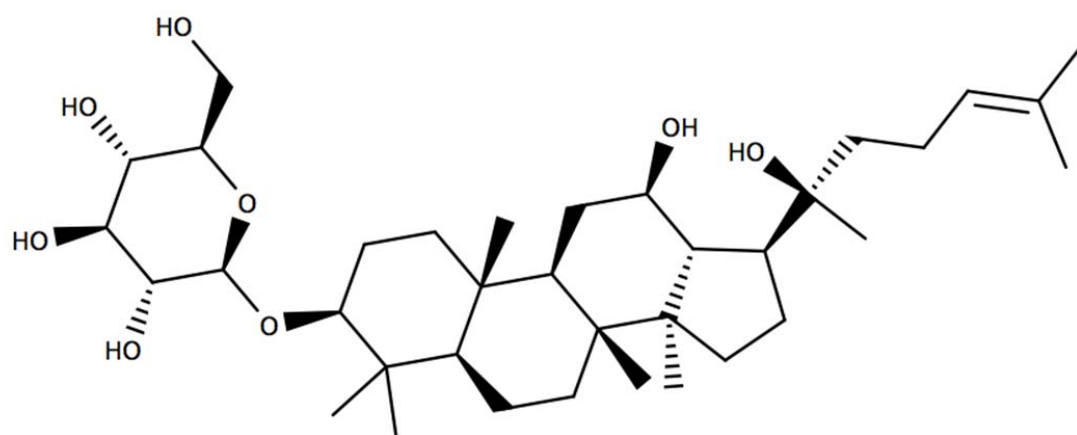

**Figure 1n. 20(R)-Ginsenoside Rh2.**
